# Supplementary material
Source: Springer Nature journal article supplement (https://www.springermedizin.de/resource/supplementary/13054_2012_1035_MOESM2_ESM.pdf/9709822)
Supplement: MOESM2 [file 9709822]

26,576 unique patients in MIMIC-II v2.5

Excluded 6,874 neonates/children (<18)

19,702 adults

Excluded 711 adults without a hospital id/clinical data

18,991 adults with clinical data

Removed 2,179 adults without weight data from the primary analyses\*

16,812 adults with weight data (final sample for the primary analyses)
